# Supplementary material for: Chemical, computational and functional insights into the chemical stability of the Hedgehog pathway inhibitor GANT61
Source: PubMed Central journal article supplement (PMC6009951; doi:10.1080/14756366.2017.1419221), 2018-01-17
Supplement: IENZ_A_1419221_SM2919.pdf [file IENZ_A_1419221_SM2919.pdf]

# Chemical, computational and functional insights into the chemical stability of the Hedgehog pathway inhibitor GANT61

## Supporting Information Figures

|                                                                     |         |
|---------------------------------------------------------------------|---------|
| <b>Figure S1.</b> HPLC-UV chromatograms .....                       | page S2 |
| <b>Figure S2.</b> HPLC-ELSD chromatograms .....                     | page S3 |
| <b>Figure S2.</b> Predicted binding mode of GANT61-D to Gli1ZF..... | page S4 |

## NMR and MS Spectra

|                                                            |              |
|------------------------------------------------------------|--------------|
| <sup>1</sup> H NMR of 2-(dimethylamino)benzaldehyde .....  | page S5      |
| <sup>13</sup> C NMR of 2-(dimethylamino)benzaldehyde ..... | page S6      |
| <sup>1</sup> H NMR of GANT61-D .....                       | page S7      |
| <sup>13</sup> C NMR of GANT61-D .....                      | page S8      |
| <sup>1</sup> H NMR of GANT61 .....                         | pages S9-S10 |
| <sup>13</sup> C NMR of GANT61 .....                        | page S11     |
| ESI MS of GANT61-D .....                                   | page S12     |
| ESI MS of GANT61 .....                                     | page S13     |

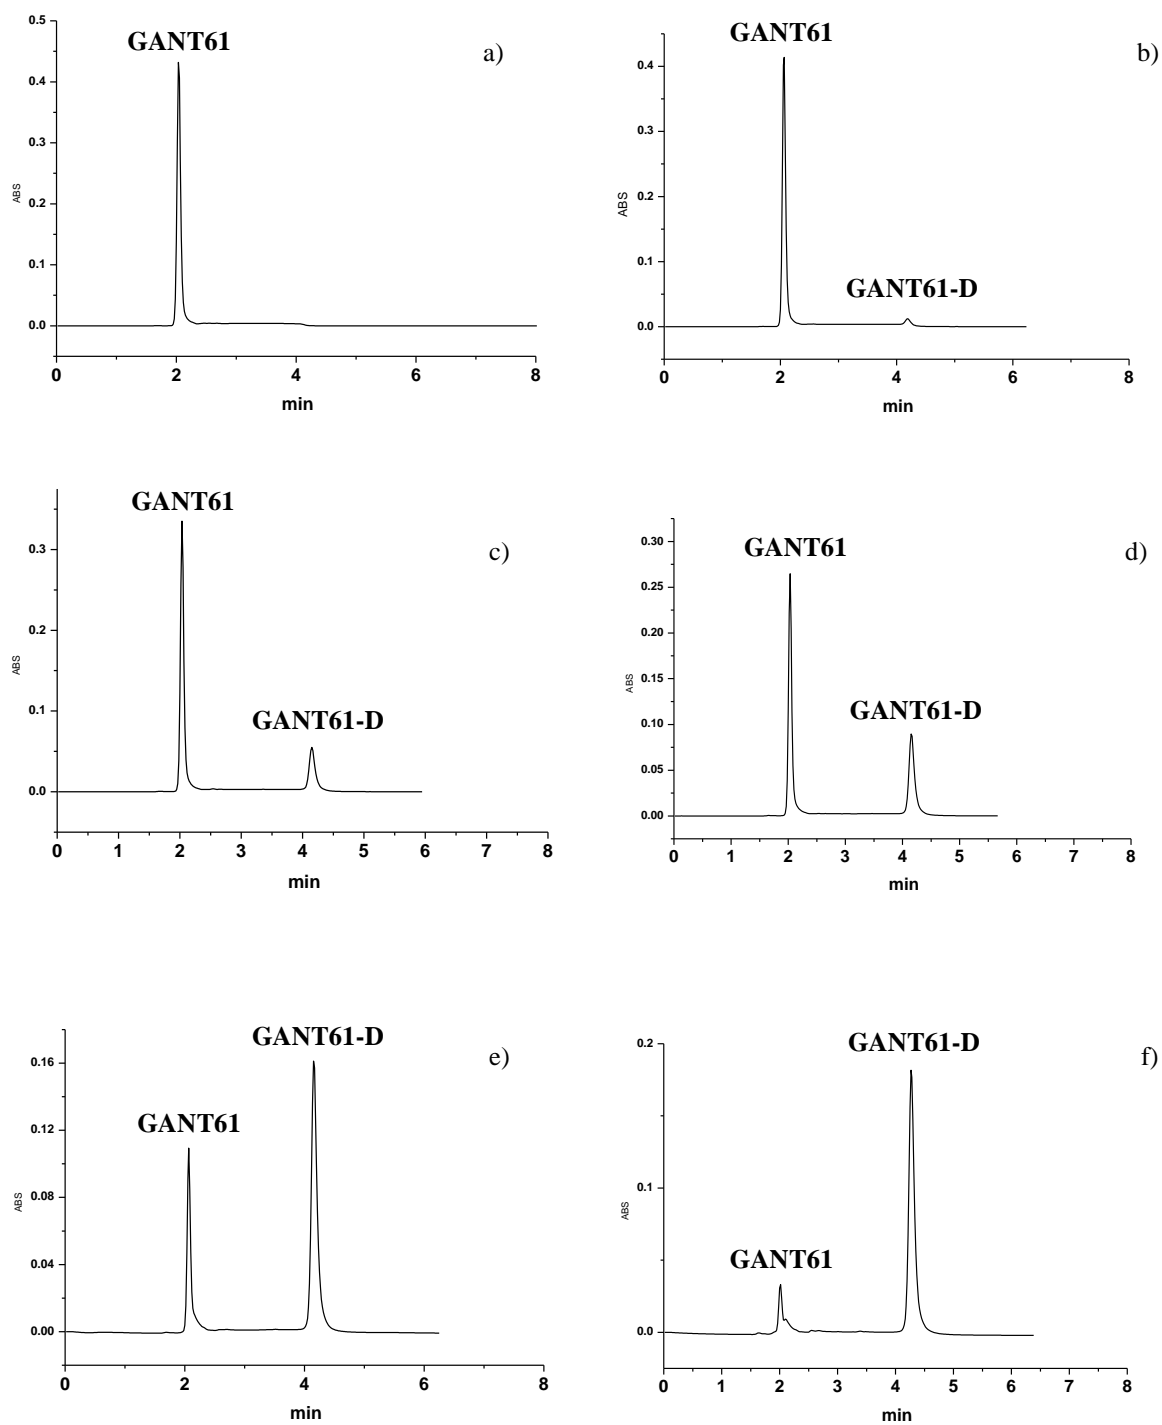

**Figure S1.** HPLC-UV chromatograms at different times confirm the disappearance of GANT61 and the formation of GANT61-D. **a)** GANT61 in CH<sub>3</sub>CN; **b–f)** GANT61 in CH<sub>3</sub>CN/100 mM NH<sub>4</sub>OAc, pH=4.5; 95/5, v/v: **b)** t = 0 min; **c)** t = 15 min; **d)** t = 30 min; **e)** t = 75 min; **f)** t = 24 h.

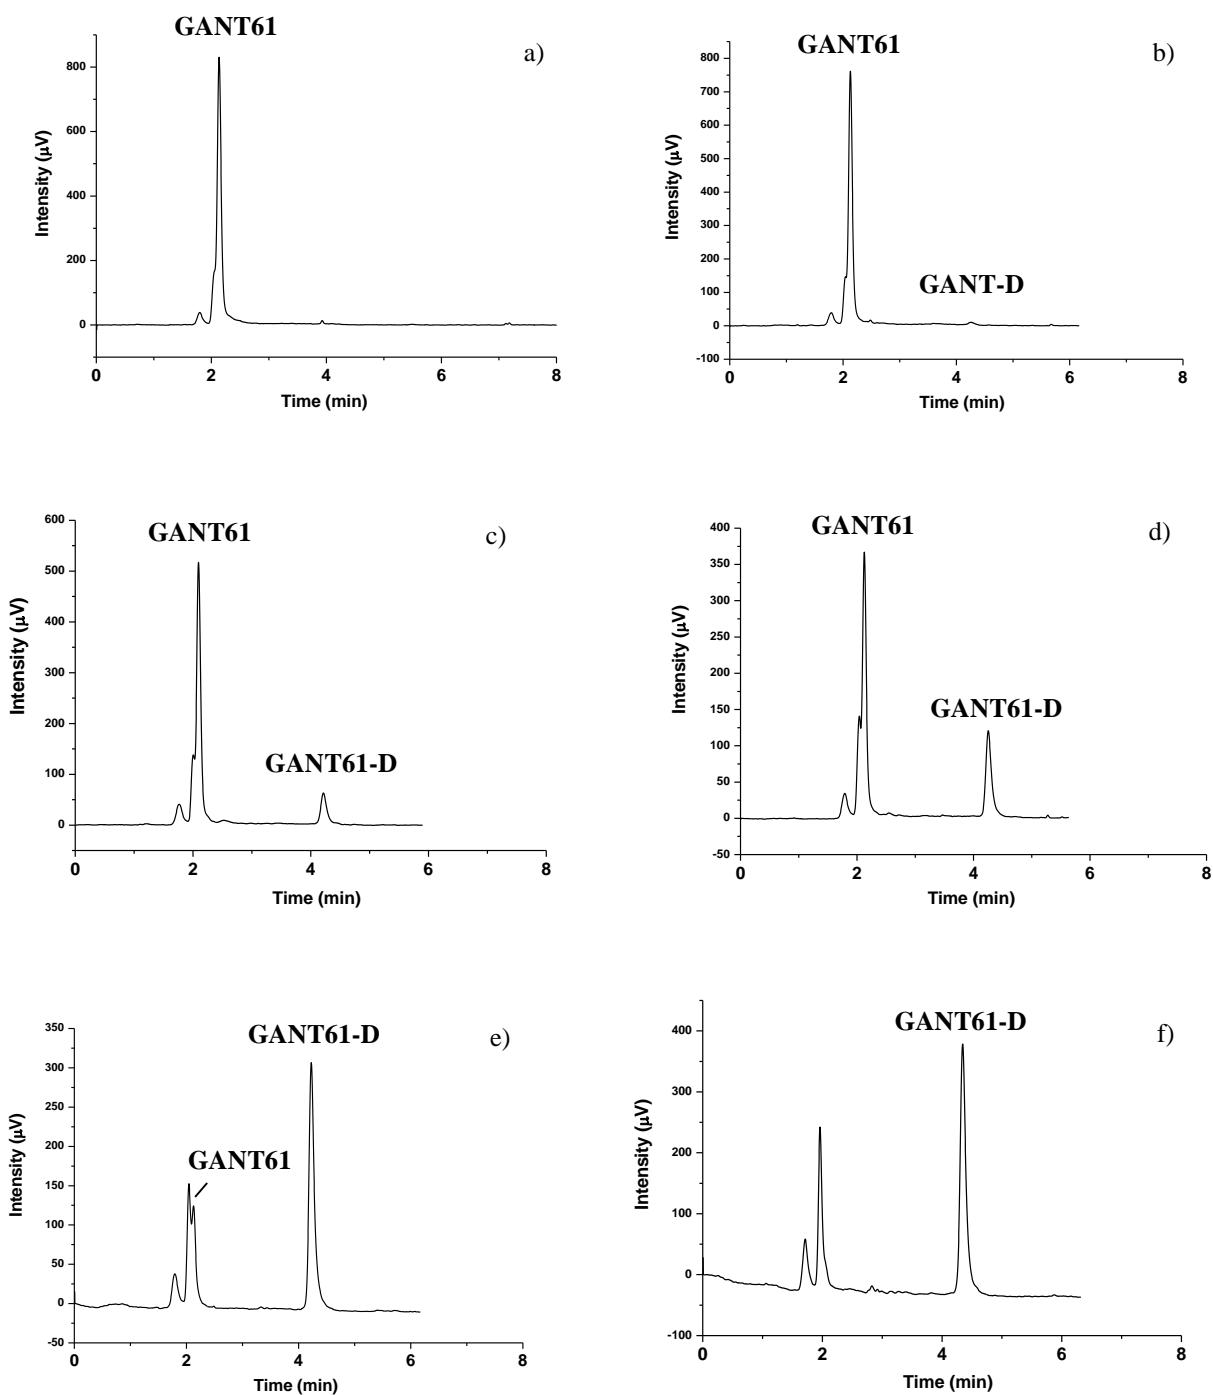

**Figure S2.** HPLC-ELSD chromatograms at different times confirm the disappearance of GANT61 and the formation of GANT61-D. **a)** GANT61 in  $\text{CH}_3\text{CN}$ ; **b–f)** GANT61 in  $\text{CH}_3\text{CN}/100 \text{ mM NH}_4\text{OAc}$ ,  $\text{pH}=4.5$ ; 95/5, v/v: **b)**  $t = 0 \text{ min}$ ; **c)**  $t = 15 \text{ min}$ ; **d)**  $t = 30 \text{ min}$ ; **e)**  $t = 75 \text{ min}$ ; **f)**  $t = 24 \text{ h}$ .

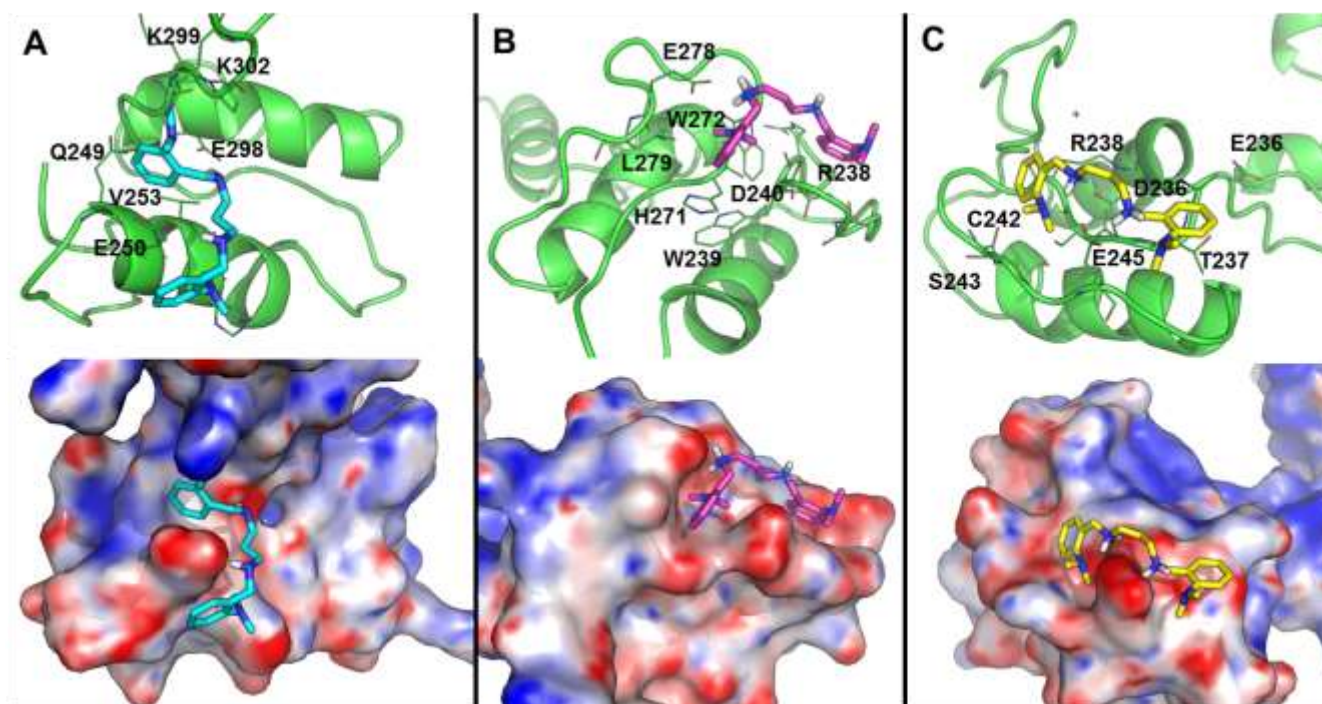

**Figure S3.** Magnification of GANT61-D binding modes to Gli1ZF. **A)** predicted binding mode of the neutral form of GANT61-D (cyan sticks); **B)** predicted binding mode of the mono-protonated form of GANT61-D (magenta sticks); **C)** predicted binding mode of the di-protonated form of GANT61-D (yellow sticks). Gli1ZF is showed as green cartoon in top panels and surface colored according with electrostatic potential in bottom panels. Residues within 4 Å from GANT61-D are shown as green sticks and are labeled.

# <sup>1</sup>H NMR of 2-(dimethylamino)benzaldehyde

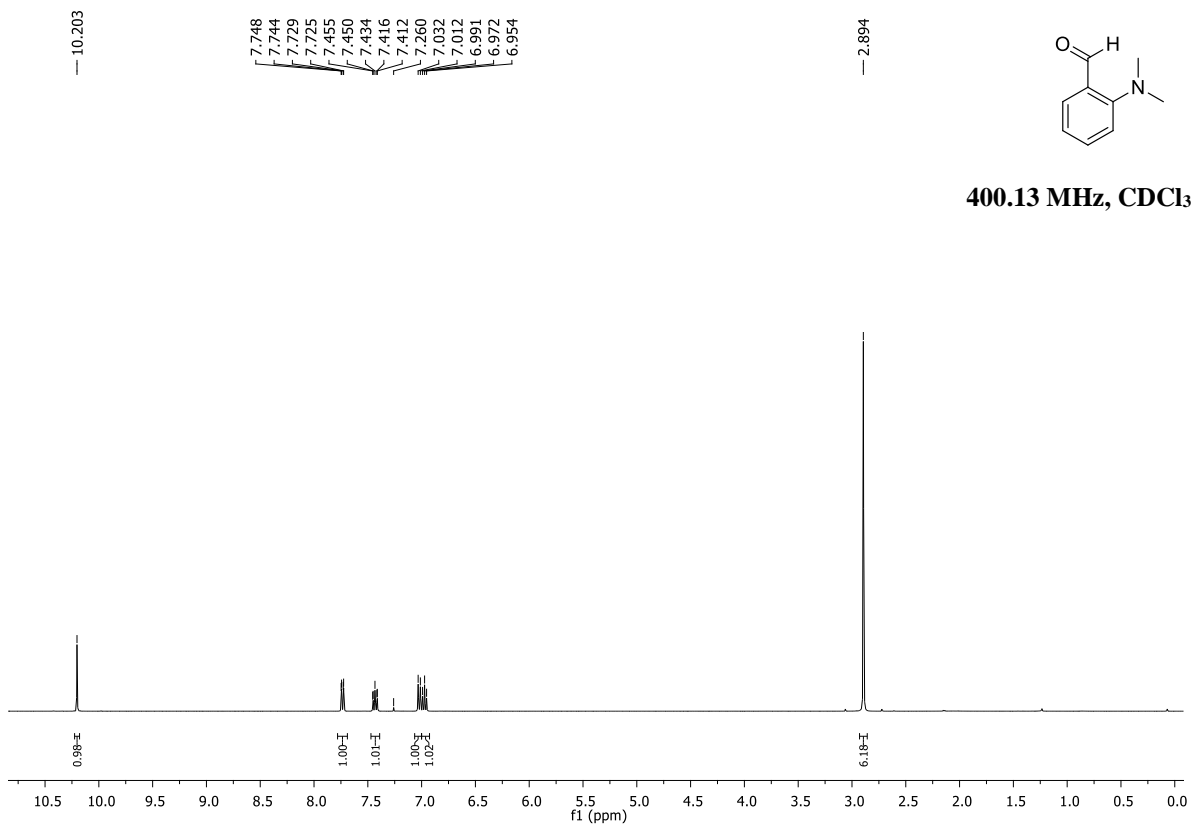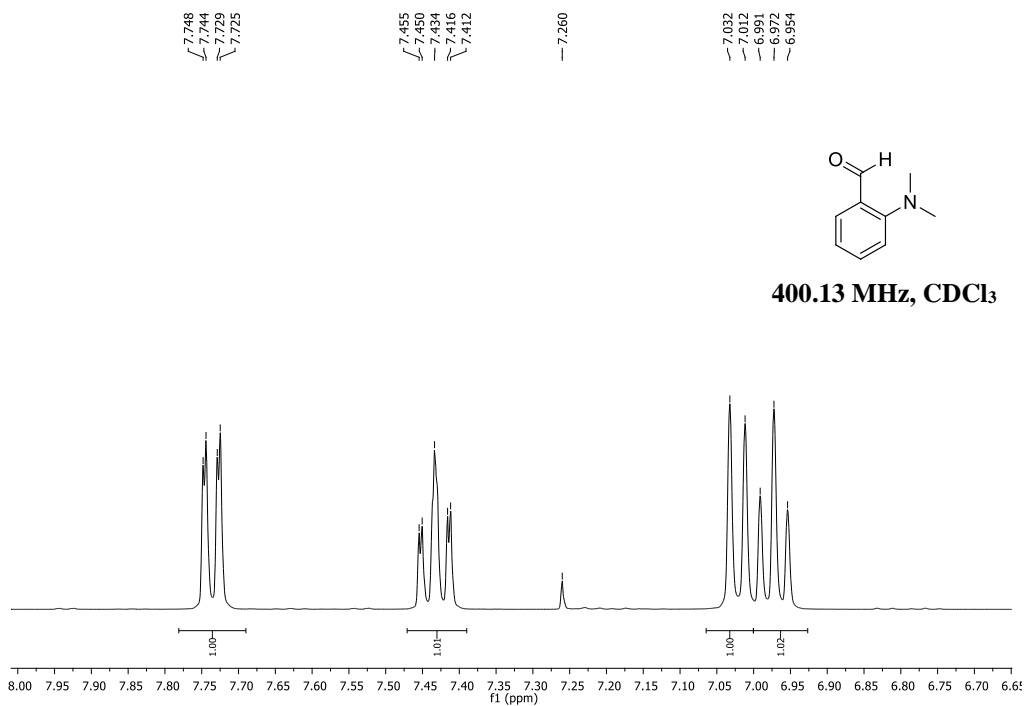

# <sup>13</sup>C NMR of 2-(dimethylamino)benzaldehyde

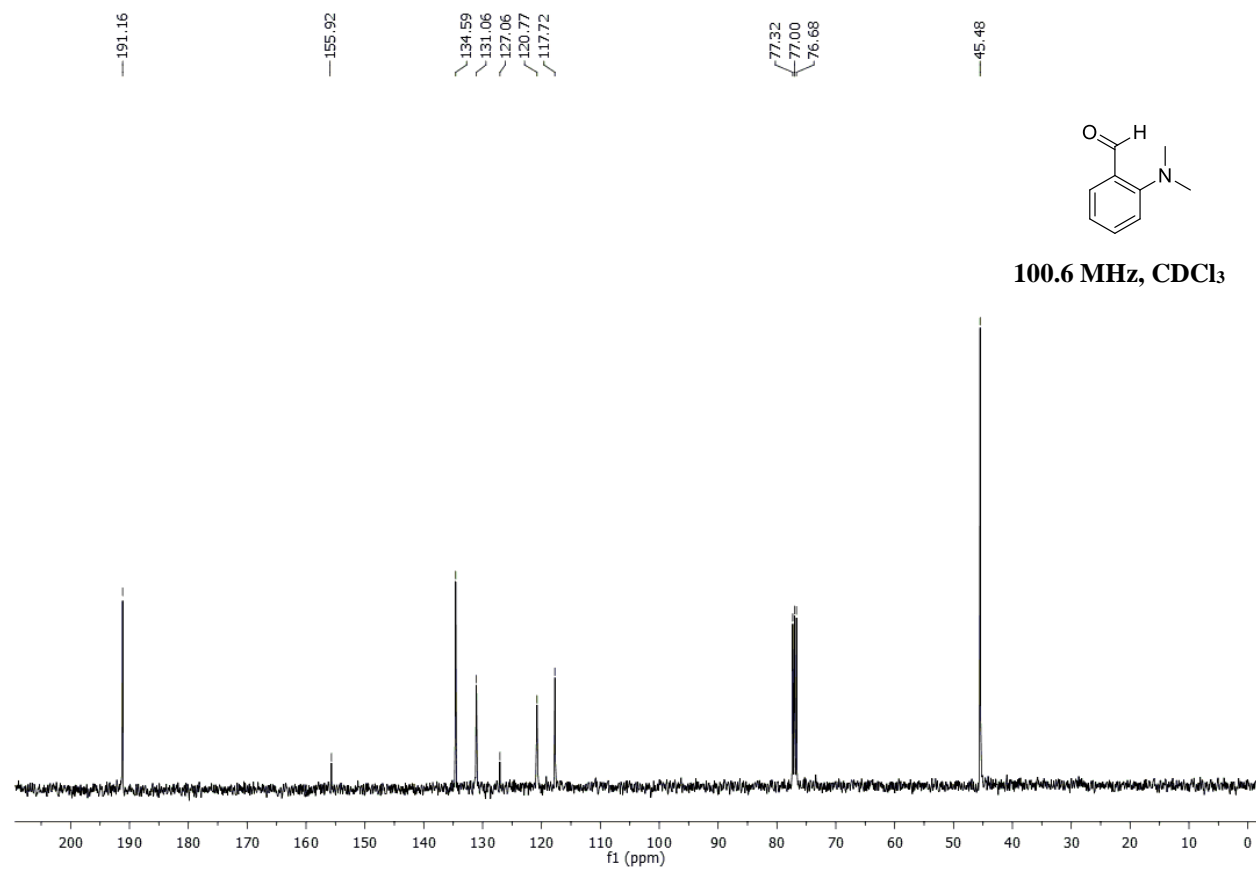

# <sup>1</sup>H NMR of GANT61-D

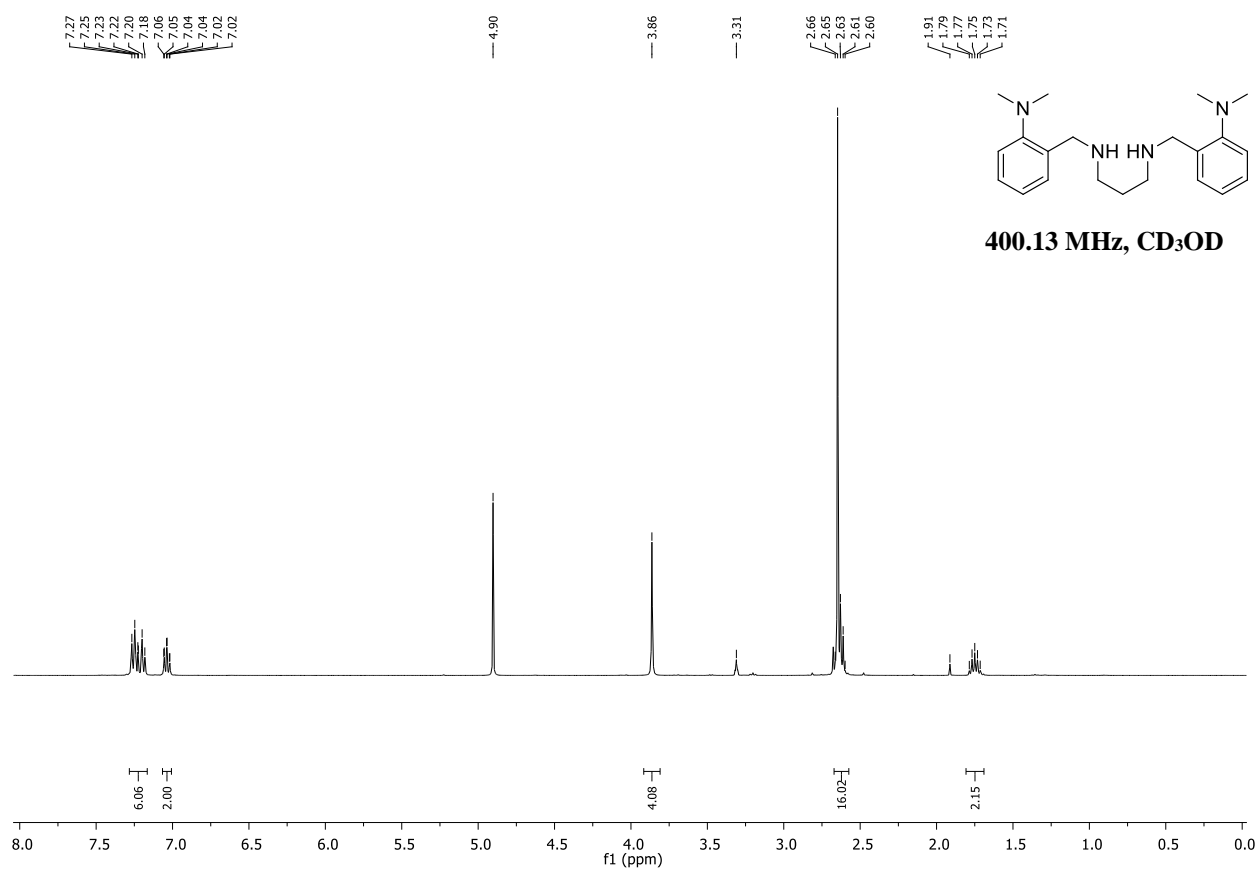

# <sup>13</sup>C NMR of GANT61-D

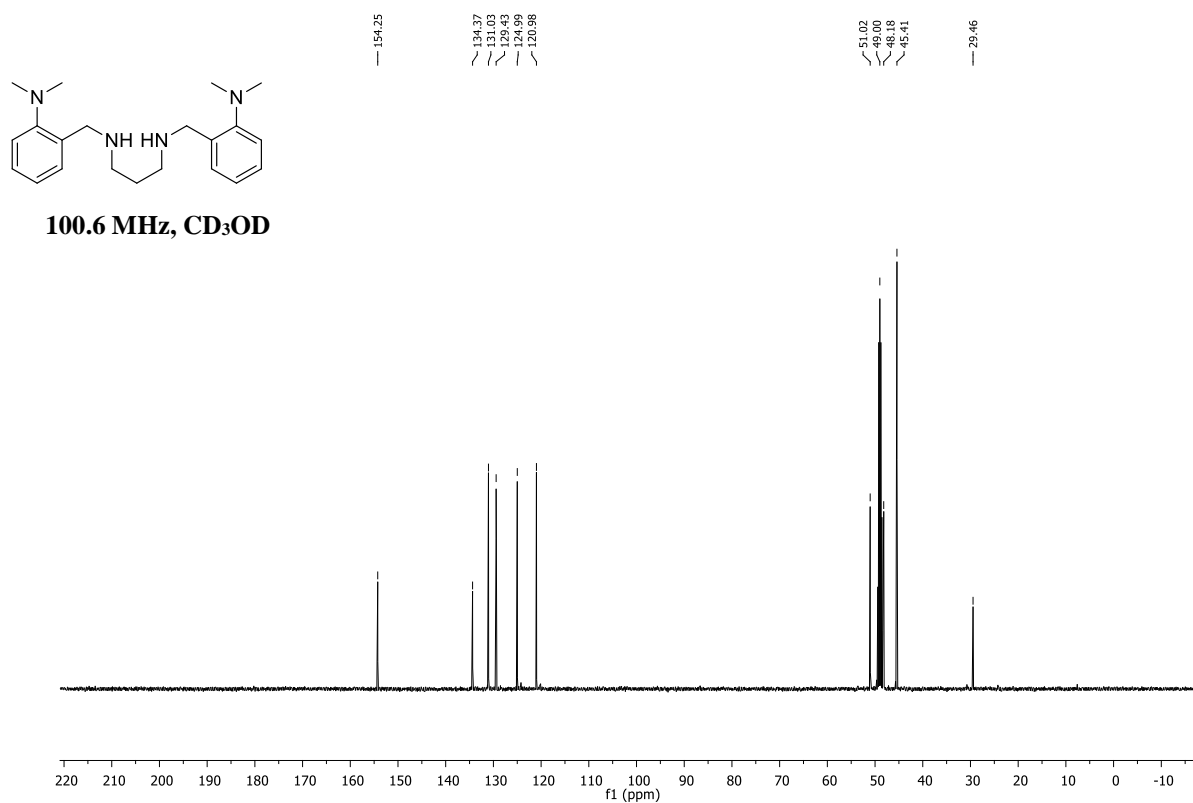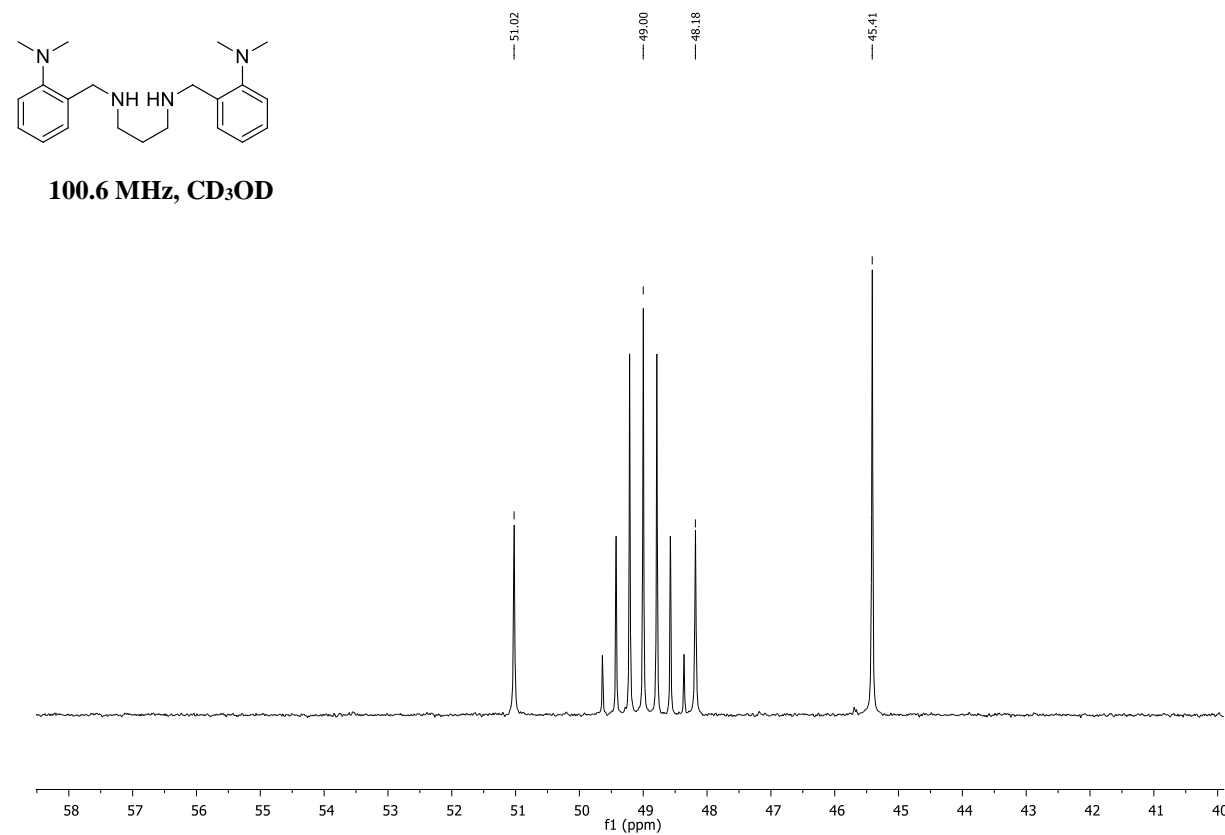



# <sup>1</sup>H NMR of GANT61

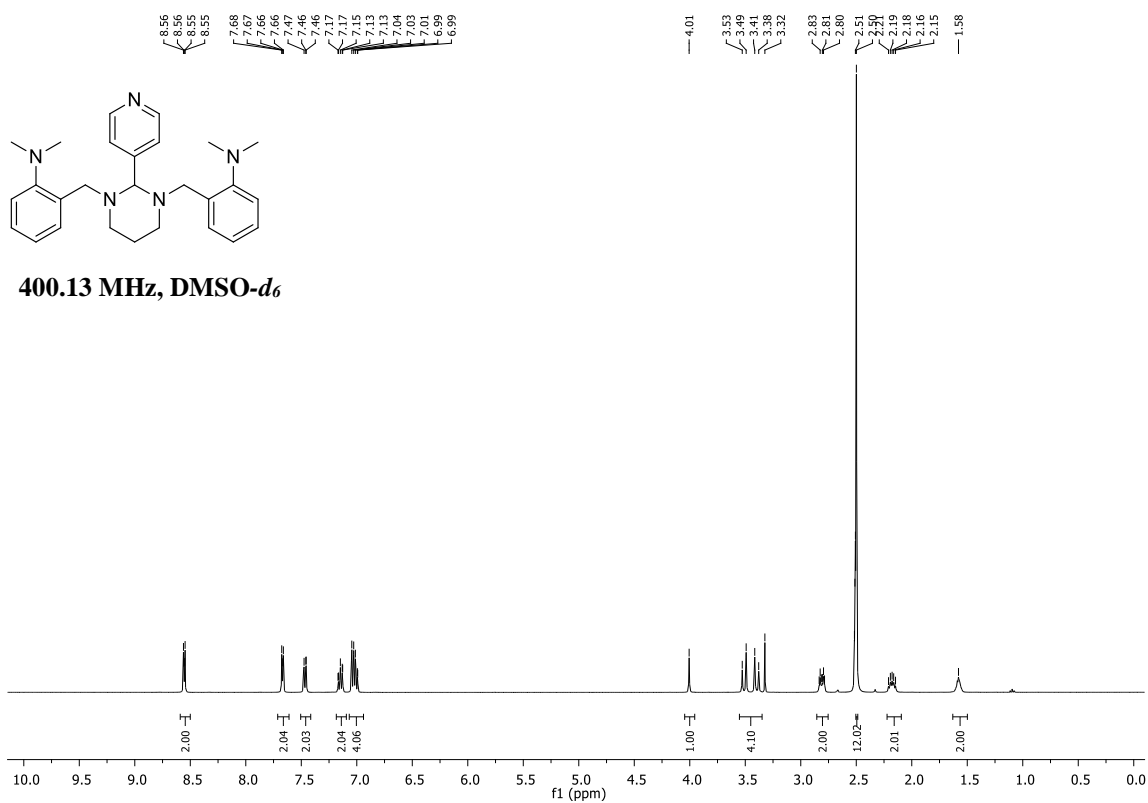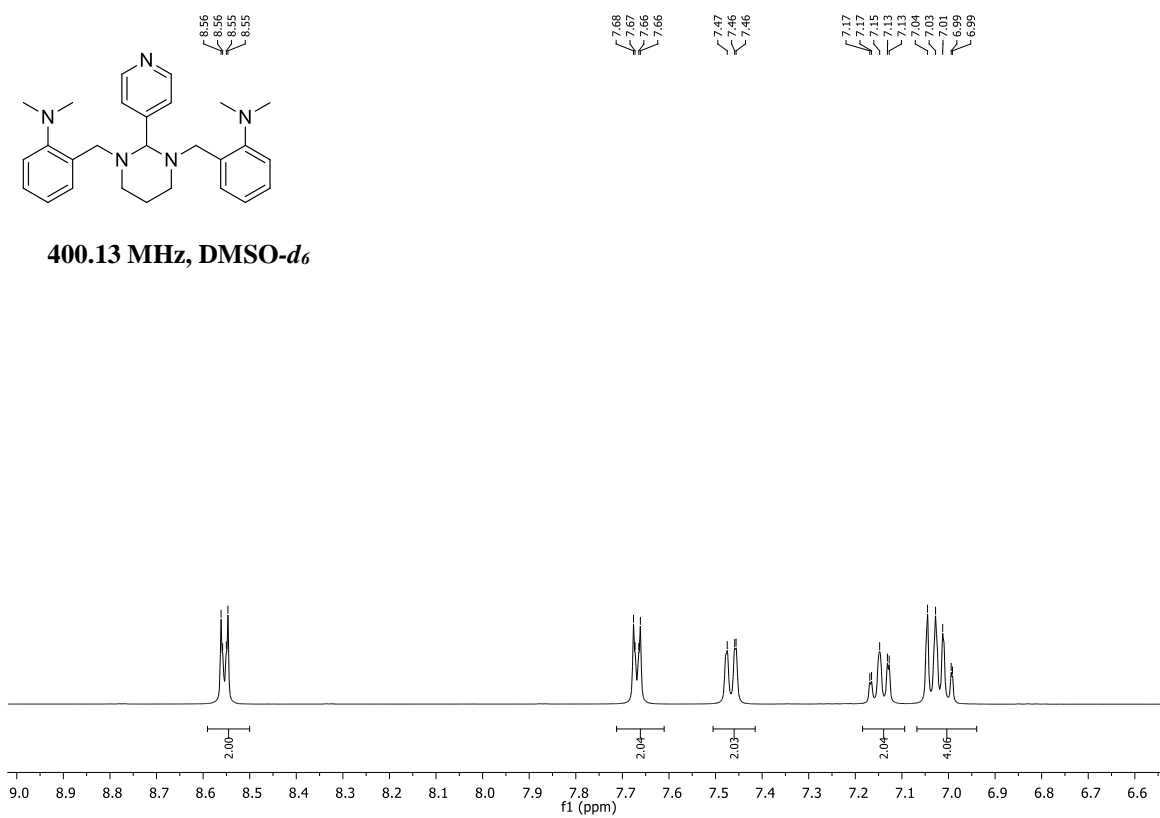

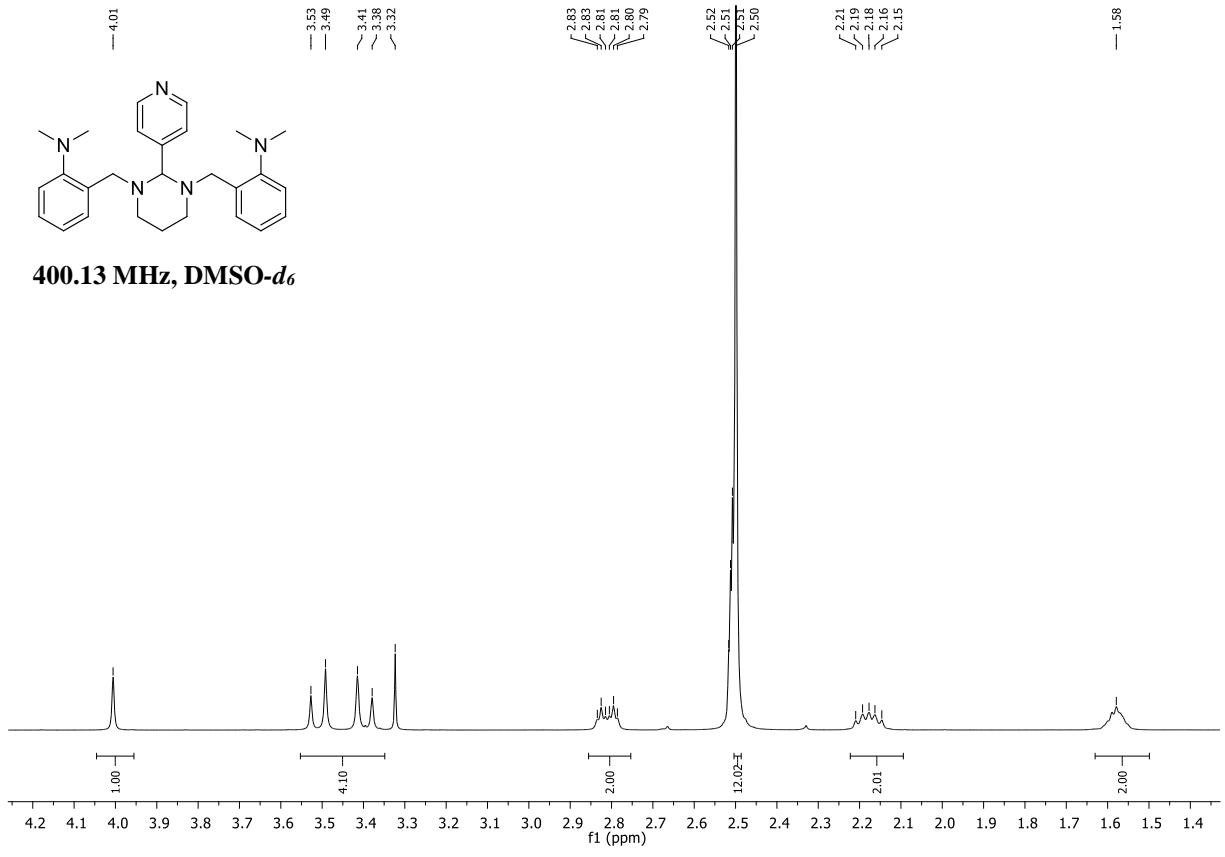

# <sup>13</sup>C NMR of GANT61

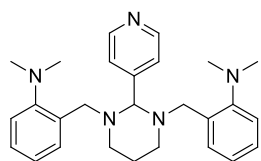

100.6 MHz, DMSO-*d*<sub>6</sub>

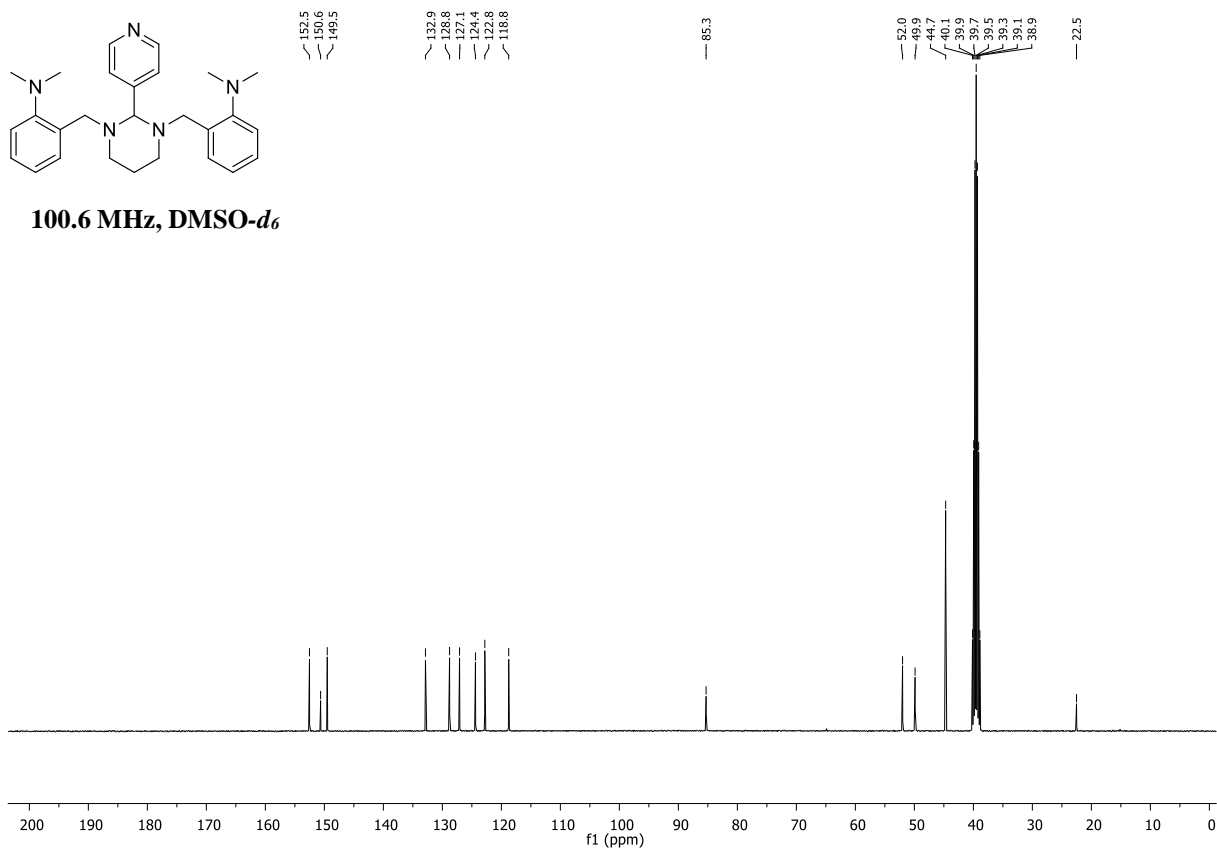

# ESI MS of GANT61-D

GANT61\_ACN\_FM #231-277 RT: 0.81-0.98  
 T: ITMS + p ESI Full ms [50.00-1500.00]

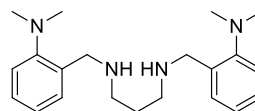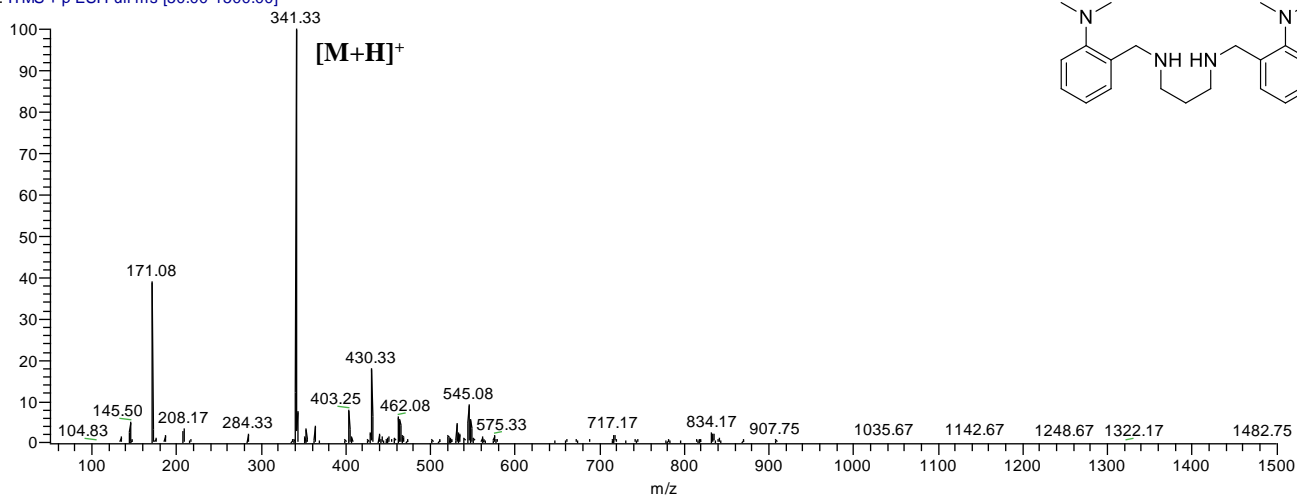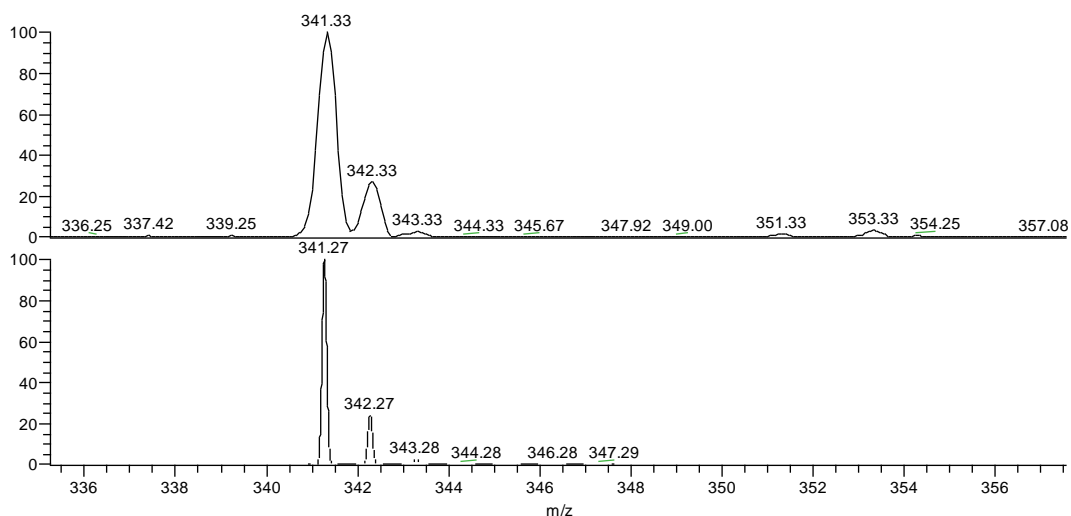

NL:  
 6.54E3  
 GANT61\_ACN\_FM#231-277  
 RT: 0.81-0.98 AV: 47 T:  
 ITMS + p ESI Full ms  
 [50.00-1500.00]

NL:  
 1.84E4  
 C<sub>21</sub>H<sub>32</sub>N<sub>4</sub> +H:  
 C<sub>21</sub>H<sub>33</sub>N<sub>4</sub>  
 p (gss, s /p:40) Chrg 1  
 R: 3000 Res .Pwr . @FWHM

# ESI MS of GANT61

GANT61 #199-215 RT: 0.71-0.75 AV: 13 N  
 T: ITMS + p ESI Full ms [50.00-1000.00]

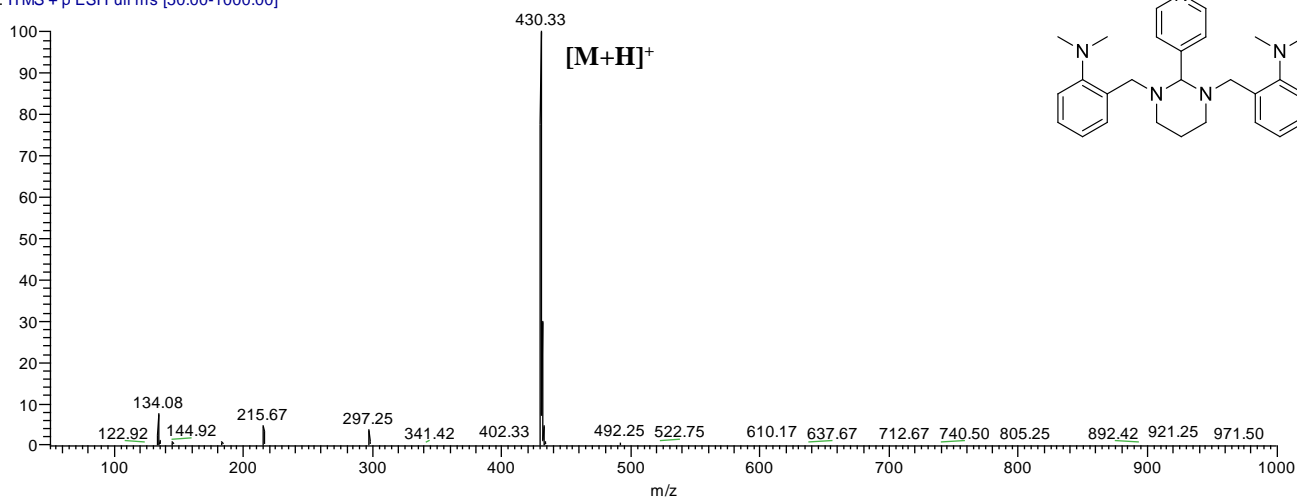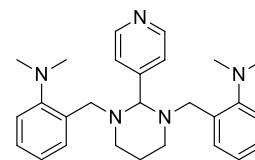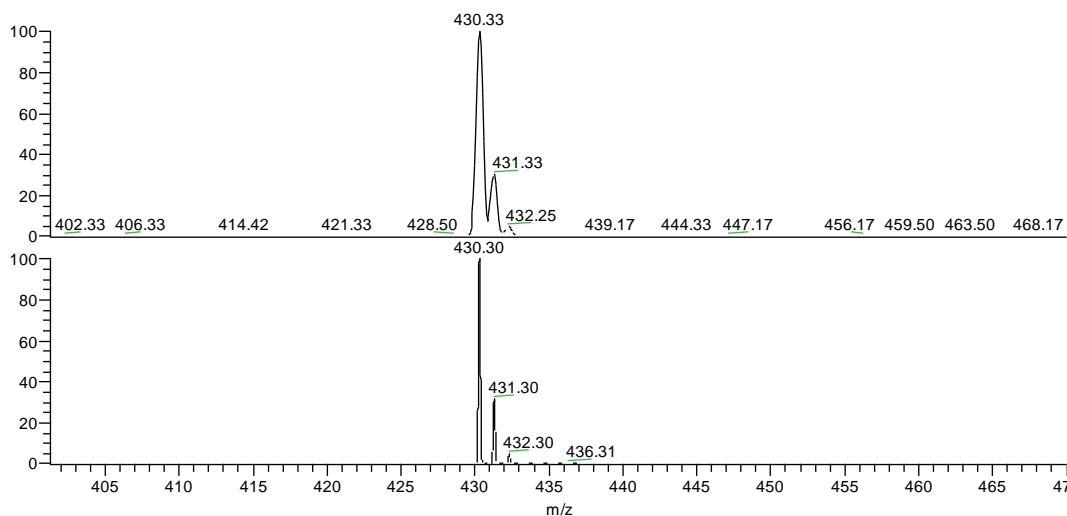

NL:  
 8.44E1  
 GANT61#199-215 RT:  
 0.71-0.75 AV: 13 T: ITMS +  
 p ESI Full ms  
 [50.00-1000.00]

NL:  
 1.72E4  
 C<sub>27</sub>H<sub>35</sub>N<sub>5</sub>+H:  
 C<sub>27</sub>H<sub>36</sub>N<sub>5</sub>  
 p (gss, s /p:40) Chrg 1  
 R: 3000 Res .Pwr . @FWHM
